# Supplementary material for: Separating a linear C5 hydrocarbon from a branched C6 hydrocarbon: n-pentane from 2,2-dimethyl butane using levitation and blow torch effects
Source: Royal Society of Chemistry journal article supplement (doi:10.1039/d1cp01615f), 2021-01-01
Supplement: d1cp01615f1.pdf [file d1cp01615f1.pdf]

## Supplementary Information

### Separating a linear C<sub>5</sub> hydrocarbon from a branched C<sub>6</sub> hydrocarbon : *n*-pentane from 2,2-dimethyl butane using Levitation and Blow torch effect

Shubhadeep Nag<sup>1</sup>, Prabal K. Maiti<sup>2</sup> and Subramanian Yashonath<sup>1a</sup>

<sup>1</sup>*Solid State and Structural Chemistry Unit,*

*Indian Institute of Science, Bangalore 560 012, India*

<sup>2</sup>*Department of Physics, Indian Institute of Science, Bangalore 560 012, India*

<sup>a</sup> *Author to whom correspondence should be*

*addressed: yashonath@iisc.ac.in and yashonath@gmail.com*

TABLE S1. Potential energy parameters for modeling zeolite NaY.

| Bonds     | $k_b$ (kJ.mol <sup>-1</sup> .Å <sup>-2</sup> )        | $b_0$ (Å)                          |
|-----------|-------------------------------------------------------|------------------------------------|
| Si-O      | 1260.0                                                | 1.61                               |
| Al-O      | 932.4                                                 | 1.73                               |
| Angles    | $k_\theta$ (kJ.mol <sup>-1</sup> .rad <sup>-2</sup> ) | $\theta_0$ (°)                     |
| O-Si-O    | 337.5                                                 | 109.5                              |
| O-Al-O    | 292.5                                                 | 109.5                              |
| Si-O-Si   | 31.5                                                  | 149.5                              |
| Al-O-Si   | 31.5                                                  | 149.5                              |
| UB        | $k_u$ (kJ.mol <sup>-1</sup> .Å <sup>-2</sup> )        | $u_0$ (Å)                          |
| Si-(O)-Si | 126.0                                                 | 3.18                               |
| Al-(O)-Si | 126.0                                                 | 3.12                               |
| vDW Type  | $\sigma$ (Å)                                          | $\epsilon$ (kJ.mol <sup>-1</sup> ) |
| Si        | 3.92                                                  | 2.52                               |
| Al        | 3.92                                                  | 2.73                               |
| O         | 3.15                                                  | 0.6384                             |
| Na        | 2.43                                                  | 0.6678                             |

TABLE S2. Lennard-Jones interaction parameters between zeolite NaY atoms and different groups of hydrocarbons of 2,2-dimethyl butane and *n*-pentane.

|                    | $\sigma$ (Å) | $\epsilon$ (kJ/mol) |
|--------------------|--------------|---------------------|
| Si-C               | 5.160        | 0.065               |
| Si-CH <sub>2</sub> | 3.935        | 0.633               |
| Si-CH <sub>3</sub> | 3.835        | 0.924               |
| Al-C               | 5.160        | 0.067               |
| Al-CH <sub>2</sub> | 3.935        | 0.658               |
| Al-CH <sub>3</sub> | 3.835        | 0.961               |
| O-C                | 4.475        | 0.051               |
| O-CH <sub>2</sub>  | 3.250        | 0.494               |
| O-CH <sub>3</sub>  | 3.150        | 0.722               |
| Na-C               | 4.415        | 0.052               |
| Na-CH <sub>2</sub> | 3.190        | 0.505               |
| Na-CH <sub>3</sub> | 3.090        | 0.739               |

TABLE S3. Bonded and non-bonded interaction parameters of 2,2-dimethyl butane ((H<sub>3</sub>C-) <sub>3</sub>(1,2,3)-C(4)-CH<sub>2</sub>(5)-CH<sub>3</sub>(6)) and *n*-pentane (CH<sub>3</sub>(1)-CH<sub>2</sub>(2)-CH<sub>2</sub>(3)-CH<sub>2</sub>(4)-CH<sub>3</sub>(5)) molecules.

| 2,2-dimethyl butane              |             |                      |                                                  |             |
|----------------------------------|-------------|----------------------|--------------------------------------------------|-------------|
| Angles                           |             | $\theta(^{\circ})$   | $k_{\theta}(\text{kJ.mol}^{-1}.\text{rad}^{-2})$ |             |
| 6-5-4                            |             | 114.0                | 519.625                                          |             |
| 5-4-1                            |             | 109.5                | 519.625                                          |             |
| 5-4-2                            |             | 109.5                | 519.625                                          |             |
| 5-4-3                            |             | 109.5                | 519.625                                          |             |
| 2-4-1                            |             | 109.5                | 519.625                                          |             |
| 2-4-3                            |             | 109.5                | 519.625                                          |             |
| 1-4-3                            |             | 109.5                | 519.625                                          |             |
| Dihedrals                        | $c_0$       | $c_1$                | $c_2$                                            | $c_3$       |
| $\phi$                           | (K* $k_B$ ) | (K* $k_B$ )          | (K* $k_B$ )                                      | (K* $k_B$ ) |
| 6-5-4-1                          | 0.00        | 0.00                 | 0.00                                             | 3.835       |
| 6-5-4-2                          | 0.00        | 0.00                 | 0.00                                             | 3.835       |
| 6-5-4-3                          | 0.00        | 0.00                 | 0.00                                             | 3.835       |
| <i>n</i> -pentane                |             |                      |                                                  |             |
| Angles                           |             | $\theta(^{\circ})$   | $k_{\theta}(\text{kJ.mol}^{-1}.\text{rad}^{-2})$ |             |
| 1-2-3(3)                         |             | 114.0                | 519.625                                          |             |
| Dihedrals                        | $c_0$       | $c_1$                | $c_2$                                            | $c_3$       |
| $\phi$                           | (K* $k_B$ ) | (K* $k_B$ )          | (K* $k_B$ )                                      | (K* $k_B$ ) |
| 1-2-3-4(2)                       | 0.00        | 2.95                 | -0.56                                            | 6.58        |
| Nonbonded(self interaction)      |             |                      |                                                  |             |
| Group                            |             | $\sigma \text{ \AA}$ | $\epsilon$ (kJ/mol)                              |             |
| C-C                              |             | 6.400                | 0.004                                            |             |
| CH <sub>2</sub> -CH <sub>2</sub> |             | 3.950                | 0.382                                            |             |
| CH <sub>3</sub> -CH <sub>3</sub> |             | 3.750                | 0.814                                            |             |
